# Supplementary material for: Heterogeneities in infection outcomes across species: sex and tissue differences in virus susceptibility
Source: PubMed Central journal article supplement (PMC7614206; doi:10.24072/pcjournal.242), 2023-02-07
Supplement: EMS164615-supplement-Supplementary_Material.pdf [file EMS164615-supplement-Supplementary_Material.pdf]

599

600 **Supplementary information**

601

602 **Table S1:** Full list of species used in the sex difference experiment and their rearing food for  
 603 stock populations. All cornmeal and proprionic medium have dried yeast sprinkled onto the  
 604 surface of the food, other food types do not unless stated below. The recipes for the food  
 605 types are described here <https://doi.org/10.6084/m9.figshare.21590724.v1>  
 606

| Species               | Food         |
|-----------------------|--------------|
| <i>D.affinis</i>      | Malt         |
| <i>D.americana</i>    | Malt         |
| <i>D.ananassae</i>    | Cornmeal     |
| <i>D.arizonae</i>     | Banana       |
| <i>D.buzzatii</i>     | Malt         |
| <i>D.erecta</i>       | Malt + yeast |
| <i>D.flavomontana</i> | Malt + yeast |
| <i>D.hydei</i>        | Cornmeal     |
| <i>D.immigrans</i>    | Malt + yeast |
| <i>D.lacicola</i>     | Malt         |
| <i>D.littoralis</i>   | Banana       |
| <i>D.mauritiana</i>   | Proprionic   |
| <i>D.melanogaster</i> | Cornmeal     |
| <i>D.montana</i>      | Malt + yeast |
| <i>D.novamexicana</i> | Banana       |
| <i>D.obscura</i>      | Proprionic   |
| <i>D.persimilis</i>   | Malt         |
| <i>D.prosaltans</i>   | Proprionic   |

|                        |           |
|------------------------|-----------|
| <i>D.pseudoobscura</i> | Malt      |
| <i>D.putrida</i>       | Propionic |
| <i>D.santomea</i>      | Cornmeal  |
| <i>D.sturtevanti</i>   | Cornmeal  |
| <i>D.takahashii</i>    | Cornmeal  |
| <i>D.teissieri</i>     | Cornmeal  |
| <i>D.virilis</i>       | Propionic |
| <i>H.duncani</i>       | Propionic |
| <i>S. lativittata</i>  | Banana    |
| <i>S.lebanonensis</i>  | Propionic |
| <i>Z. inermis</i>      | Banana    |
| <i>Z. taronus</i>      | Banana    |
| <i>Z. tuberculatus</i> | Banana    |

---

607

608
